# Supplementary material for: Nutrition and Diet Apps: Brazilian Panorama before and during the COVID-19 Pandemic
Source: MDPI journal article supplement (doi:10.3390/nu15163606), 2023-08-17
Supplement: s1 [file s1]

**Table S1** - Relative and absolute frequencies of data for all nutrition-related apps found on official Apple and Google Stores websites and platforms.

| Variables                                   |               | All (n=757)     |                |                      |
|---------------------------------------------|---------------|-----------------|----------------|----------------------|
| <b>Number of languages available by app</b> |               |                 |                |                      |
| 01 – 10                                     |               | 96.6% (n=731)   |                |                      |
| 11 – 20                                     |               | 2.5% (n=19)     |                |                      |
| 21 – 30                                     |               | 0.5% (n=4)      |                |                      |
| > 30                                        |               | 0.4% (n=3)      |                |                      |
| <b>Target population</b>                    |               |                 |                |                      |
| <18 years                                   |               | 95.6% (n=724)   |                |                      |
| >18 years                                   |               | 4.2% (n=32)     |                |                      |
| No information                              |               | 0.1% (n=1)      |                |                      |
| <b>Investment for use</b>                   |               |                 |                |                      |
| Free                                        |               | 17.8% (n=135)   |                |                      |
| Payment                                     |               | 59.0% (n=447)   |                |                      |
| No information                              |               | 23.1% (n=175)   |                |                      |
| <b>Prices</b>                               |               |                 |                |                      |
| Up to US\$11.99                             |               | 26.9% (n=204)   |                |                      |
| US\$12 - \$23,99                            |               | 5.7% (n=43)     |                |                      |
| >US\$24                                     |               | 6.1% (n=46)     |                |                      |
| No information                              |               | 43.5% (n=329)   |                |                      |
| <b>Seller</b>                               |               |                 |                |                      |
| One app                                     |               | 90.4% (n=587)   |                |                      |
| Two apps                                    |               | 6.8% (n=44)     |                |                      |
| Three apps                                  |               | 1.5% (n=10)     |                |                      |
| Four apps                                   |               | 1.3% (n=8)      |                |                      |
| <b>Number of reviews</b>                    |               |                 |                |                      |
|                                             | iOS device    | Apple (Website) | Android device | Play Store (Website) |
| < 9.999                                     | 35.5%(n=269)  | 36.3% (n=275)   | 19% (n=144)    | 32.5(n=246)          |
| 10.000 – 19.999                             | 1.7% (n=13)   | 1.1% (n=8)      | 2.4% (n=18)    | 2.1% (n=16)          |
| > 20.000                                    | 5.4% (n=41)   | 4.8% (n=3)      | 6.5% (n=49)    | 8.9% (n=67)          |
| No information                              | 57.3% (n=434) | 57.9%(n=438)    | 72.1% (n=546)  | 56.5% (n=428)        |
| <b>Number of downloads</b>                  |               |                 |                |                      |
| Up to 9.999                                 |               | 24.2% (n=183)   |                |                      |
| 10.000 – 19.999                             |               | 12.5% (n=95)    |                |                      |
| > 20.000                                    |               | 41.6% (n=315)   |                |                      |
| No information                              |               | 21.7% (n=164)   |                |                      |
| <b>Consumer rating</b>                      |               |                 |                |                      |
|                                             | iOS device    | Apple (Website) | Android device | Play Store (Website) |
| ≤3.0                                        | 9.8% (n=74)   | 1.6% (n=12)     | 3% (n=23)      | 2% (n=15)            |

|                |               |               |               |               |
|----------------|---------------|---------------|---------------|---------------|
| 3.1 – 3.9      | 2.9% (n=22)   | 0.4% (n=3)    | 3.6% (n=27)   | 5.3% (n=40)   |
| >4.0           | 47% (n=356)   | 42.3% (n=320) | 21% (n=159)   | 29.5% (n=223) |
| No information | 40.3% (n=305) | 55.7% (n=422) | 72.4% (n=548) | 63.3% (n=479) |

***Technical support***

|                |               |
|----------------|---------------|
| Yes            | 95.4% (n=722) |
| No             | 4% (n=30)     |
| No information | 0,7% (n=5)    |

***Category***

|                     |               |
|---------------------|---------------|
| Health and Fitness  | 80.1% (n=606) |
| Food and drink      | 11.5% (n=87)  |
| Others <sup>e</sup> | 7.7% (n=58)   |
| No information      | 0.8% (n=6)    |

***Release year***

|                |               |
|----------------|---------------|
| Up to 2019     | 37.0% (n=280) |
| After 2019     | 54.3% (n=411) |
| No information | 8.7% (n=66)   |

---

Obs. For sample definition (n), we considered only the app that gave this information.

Table S2 - Relative and absolute frequencies of data from nutrition-related applications that inform the year of launch on official Apple and Google Stores websites and platforms.

| Variables                                          | Before 2019<br>(n=280) | After 2019<br>(n=411) |
|----------------------------------------------------|------------------------|-----------------------|
| <b><i>Number of languages available by app</i></b> |                        |                       |
| 01 – 10                                            | 96.4% (n=270)          | 96.6% (n=397)         |
| 11 – 20                                            | 1.8% (n=5)             | 2.9% (n=12)           |
| 21 – 30                                            | 0.7% (n=3)             | 0.5% (n=2)            |
| > 30                                               | 1.1% (n=3)             | -                     |
| <b><i>Target population</i></b>                    |                        |                       |
| <18 years                                          | 96.4% (n=270)          | 95.6% (n=393)         |
| >18 years                                          | 3.6% (n=10)            | 4.1% (n=17)           |
| No information                                     | -                      | 0.2% (n=1)            |
| <b><i>Investment for use</i></b>                   |                        |                       |
| Free                                               | 25.7% (n=72)           | 12.2% (n=50)          |
| Payment                                            | 52.1% (n=146)          | 65.5% (n=269)         |
| No information                                     | 22.1% (n=62)           | 22.4% (n=92)          |
| <b><i>Prices</i></b>                               |                        |                       |
| Up to US\$11.99                                    | 45.2% (n=66)           | 43.5% (n=117)         |
| US\$12 - \$23,99                                   | 6.8% (n=10)            | 11.5% (n=31)          |
| >US\$24                                            | 6.8% (n=10)            | 12.6% (n=34)          |
| No information                                     | 41.1% (n=60)           | 32.3% (n=87)          |
| <b><i>Seller</i></b>                               |                        |                       |
| One app                                            | 94% (n=236)            | 90.1% (n=317)         |
| Two apps                                           | 3.6% (n=9)             | 8% (n=28)             |

|             |            |            |
|-------------|------------|------------|
| Three apps  | 0.8% (n=2) | 0.9% (n=3) |
| Four apps   | 0.8% (n=2) | 0.3% (n=1) |
| > four apps | 0.8% (n=2) | 0.9% (n=3) |

| <i>Number of reviews <sup>a</sup></i> | iOS device  |               | Apple (Website) |               | Android device |               | Play Store (Website) |               |
|---------------------------------------|-------------|---------------|-----------------|---------------|----------------|---------------|----------------------|---------------|
| < 9.999                               | 40% (n=111) | 36% (n=148)   | 40% (n=112)     | 33.8% (n=139) | 17.1% (n=48)   | 20.2% (n=83)  | 35.4% (n=99)         | 29.9% (n=123) |
| 10.000 – 19.999                       | 1% (n=3)    | 1.2% (n=5)    | 1% (n=4)        | 2.2% (n=9)    | 3.2% (n=9)     | 1.5% (n=6)    | 2.9% (n=8)           | 1.5% (n=6)    |
| > 20.000                              | 3% (n=8)    | 6.3% (n=26)   | 3.2 (n=9)       | 7.5% (n=31)   | 4.3% (n=12)    | 8% (n=33)     | 7.1% (n=20)          | 10.5% (n=43)  |
| No information                        | 56% (n=158) | 56.4% (n=232) | 55.4% (n=155)   | 56.4% (n=232) | 75.4% (n=211)  | 70.3% (n=289) | 54.6% (n=153)        | 58.2% (n=239) |

| <i>Number of downloads <sup>b</sup></i> | iOS device    |  | Apple (Website) |  | Android device |  | Play Store (Website) |               |
|-----------------------------------------|---------------|--|-----------------|--|----------------|--|----------------------|---------------|
| Up to 9.999                             | 22.9% (n=64)  |  |                 |  |                |  |                      | 23.6% (n=97)  |
| 10.000 – 19.999                         | 11.1% (n=31)  |  |                 |  |                |  |                      | 14.4% (n=59)  |
| > 20.000                                | 41.4% (n=116) |  |                 |  |                |  |                      | 42.6% (n=175) |
| No information                          | 24.6% (n=69)  |  |                 |  |                |  |                      | 19.5% (n=80)  |

| <i>Consumer rating <sup>c</sup></i> | iOS device   |               | Apple (Website) |               | Android device |               | Play Store (Website) |               |
|-------------------------------------|--------------|---------------|-----------------|---------------|----------------|---------------|----------------------|---------------|
| ≤3.0                                | 16.1% (n=45) | 5.4% (n=22)   | 2.9% (n=8)      | 0.7% (n=3)    | 2.9% (n=8)     | 3.4% (n=14)   | 2.1% (n=6)           | 1.7% (n=7)    |
| 3.1 – 3.9                           | 5% (n=14)    | 1.7% (n=7)    | 0.4% (n=1)      | 0.2% (n=1)    | 3.6% (n=10)    | 3.2% (n=13)   | 6.1% (n=17)          | 4.9% (n=20)   |
| >4.0                                | 50% (n=140)  | 44.3% (n=182) | 42.5% (119)     | 44.5% (n=183) | 18.2% (n=51)   | 22.9% (n=94)  | 27.1% (n=76)         | 31.6% (n=130) |
| No information                      | 28.9% (n=81) | 48.7% (n=200) | 54.3% (n=152)   | 54.5% (n=224) | 75.4% (n=211)  | 70.6% (n=290) | 64.6% (n=181)        | 61.8% (n=254) |

| <i>Technical support</i> | iOS device    |  | Apple (Website) |  | Android device |  | Play Store (Website) |               |
|--------------------------|---------------|--|-----------------|--|----------------|--|----------------------|---------------|
| Yes                      | 96.8% (n=271) |  |                 |  |                |  |                      | 94.4% (n=388) |
| No                       | 2.9% (n=8)    |  |                 |  |                |  |                      | 5.1% (n=21)   |
| No information           | 0.4% (n=1)    |  |                 |  |                |  |                      | 0.5% (n=2)    |

<sup>a, b, c</sup> Due to divergent values, four values were inserted. The information was collected on mobile devices with iOS and Android systems and on the official websites of the Google Store and Apple Store. Data are presented in the following order: iOS device, Apple (Website), Android device, and Play Store (Website).
